# Supplementary material for: Will landscape responses reduce glacier sensitivity to climate change in High Mountain Asia?
Source: Copernicus journal article supplement (doi:10.5194/egusphere-2024-4033), 2025-01-29
Supplement: Supplementary file 1 [file egusphere-2024-4033-supplement.pdf]

| Site            | Sample ID | Latit. (°N) | Long. (°E) | Age (ka)   | A        | Alt. masl | Dating          | B       | Reference              |
|-----------------|-----------|-------------|------------|------------|----------|-----------|-----------------|---------|------------------------|
| Shatial         | PK03      | NS          | NS         | 20.0± 3.1  | NS       | NS        | OSL             | LGM     | Richards et al. (2000) |
|                 |           | NS          | NS         | 15.9± 3.1  | NS       | NS        | OSL             | PG      | Richards et al. (2000) |
|                 |           | NS          | NS         | 61.0± 9.7  | NS       | NS        | OSL             | Pre LGM | Richards et al. (2000) |
|                 |           | NS          | NS         | 38.9± 9.5  | NS       | NS        | OSL             | Pre LGM | Richards et al. (2000) |
|                 |           | NS          | NS         | 54.6± 8.6  | NS       | NS        | OSL             | Pre LGM | Richards et al. (2000) |
|                 |           | NS          | NS         | 51.1± 7.6  | NS       | NS        | OSL             | Pre LGM | Richards et al. (2000) |
|                 |           | NS          | NS         | 59.1± 8.5  | NS       | NS        | OSL             | Pre LGM | Richards et al. (2000) |
| Liachar         | PK07      | NS          | NS         | 22.6± 3.4  | NS       | NS        | OSL             | LGM     | Richards et al. (2000) |
|                 |           | NS          | NS         | 20.6± 3.0  | NS       | NS        | OSL             | LGM     | Richards et al. (2000) |
| Guricot         | PK13      | NS          | NS         | 3.3± 0.58  | NS       | NS        | OSL             | H       | Richards et al. (2000) |
| Rampur-Tarshing | PK15      | NS          | NS         | 15.1± 4.4  | NS       | NS        | OSL             | PG      | Richards et al. (2000) |
| Swat            | PK51      | NS          | NS         | 35.6± 12.7 | NS       | NS        | OSL             | Pre LGM | Richards et al. (2000) |
|                 |           | NS          | NS         | 40.5± 13.8 | NS       | NS        | OSL             | Pre LGM | Richards et al. (2000) |
|                 |           | NS          | NS         | 29.8± 7.1  | NS       | NS        | OSL             | Pre LGM | Richards et al. (2000) |
|                 |           | NS          | NS         | 37.9± 10.3 | NS       | NS        | OSL             | Pre LGM | Richards et al. (2000) |
|                 |           | NS          | NS         | 77.2± 18.1 | NS       | NS        | OSL             | Pre LGM | Richards et al. (2000) |
| Swat            | PK53      | NS          | NS         | 21.8± 5.2  | NS       | NS        | OSL             | LGM     | Richards et al. (2000) |
| Ke Gas          | PK58      | NS          | NS         | 28.6± 5.3  | NS       | NS        | OSL             | Pre LGM | Richards et al. (2000) |
|                 |           | NS          | NS         | 31.9± 3.8  | NS       | NS        | OSL             | Pre LGM | Richards et al. (2000) |
|                 |           | NS          | NS         | 27.0± 4.3  | NS       | NS        | OSL             | Pre LGM | Richards et al. (2000) |
| Hunza Valley    | KK98-1    | 36.46       | 74.9       | 13.6± 0.3  | Cali br. | 2550      | TCN (Be and Al) | PG      | Owen et al. (2002)     |
|                 | KK98-2    | 36.46       | 74.9       | 9.0± 0.2   | Cali br. | 2550      | TCN             | H       | Owen et al. (2002)     |
|                 | KK98-3    | 36.46       | 74.9       | 13.9± 0.4  | Cali br. | 2550      | TCN             | PG      | Owen et al. (2002)     |
|                 | KK98-4    | 36.46       | 74.9       | 9.2± 0.4   | Cali br. | 2550      | TCN             | H       | Owen et al. (2002)     |
|                 | KK98-6    | 36.46       | 74.9       | 24.6± 0.9  | Cali br. | 2640      | TCN             | LGM     | Owen et al. (2002)     |
|                 | KK98-7    | 36.46       | 74.9       | 23.3± 0.6  | Cali br. | 2635      | TCN             | LGM     | Owen et al. (2002)     |

|                 |         |            |            |            |             |      |     |            |                       |
|-----------------|---------|------------|------------|------------|-------------|------|-----|------------|-----------------------|
|                 | KK98-8  | 36.46      | 74.9       | 27.6± 0.9  | Cali<br>br. | 2640 | TCN | Pre<br>LGM | Owen et al.<br>(2002) |
|                 | KK98-9  | 36.46      | 74.9       | 23.6± 0.7  | Cali<br>br. | 2640 | TCN | LGM        | Owen et al.<br>(2002) |
|                 | KK98-10 | 36.46      | 74.9       | 22.9± 0.6  | Cali<br>br. | 2640 | TCN | LGM        | Owen et al.<br>(2002) |
|                 | KK98-11 | 36.46      | 74.9       | 15.6± 0.3  | Cali<br>br. | 2540 | TCN | PG         | Owen et al.<br>(2002) |
|                 | KK98-12 | 36.46      | 74.9       | 25.8± 0.6  | Cali<br>br. | 2540 | TCN | Pre<br>LGM | Owen et al.<br>(2002) |
|                 | KK98-13 | 36.46      | 74.9       | 19.1± 0.5  | Cali<br>br. | 2540 | TCN | LGM        | Owen et al.<br>(2002) |
|                 | KK98-14 | 36.46      | 74.9       | 24.0± 0.8  | Cali<br>br. | 2540 | TCN | LGM        | Owen et al.<br>(2002) |
|                 | KK98-15 | 36.46      | 74.9       | 18.5± 0.6  | Cali<br>br. | 2550 | TCN | LGM        | Owen et al.<br>(2002) |
|                 | KK98-21 | 36.5       | 74.87      | 15.8± 0.5  | Cali<br>br. | 2660 | TCN | PG         | Owen et al.<br>(2002) |
|                 | KK98-22 | 36.5       | 74.87      | 15.8± 0.5  | Cali<br>br. | 2670 | TCN | PG         | Owen et al.<br>(2002) |
|                 | KK98-26 | 36.5       | 74.87      | 15.8± 0.4  | Cali<br>br. | 2740 | TCN | PG         | Owen et al.<br>(2002) |
|                 | KK98-34 | 36.51      | 74.89      | 10.0± 0.3  | Cali<br>br. | 2600 | TCN | H          | Owen et al.<br>(2002) |
|                 | KK98-34 | 36.51      | 74.89      | 10.8± 0.3  | Cali<br>br. | 2610 | TCN | H          | Owen et al.<br>(2002) |
|                 | KK98-35 | 36.51      | 74.89      | 10.7± 0.3  | Cali<br>br. | 2595 | TCN | H          | Owen et al.<br>(2002) |
|                 | KK98-42 | 36.51      | 74.84      | 37.0± 1.0  | Cali<br>br. | 3310 | TCN | Pre<br>LGM | Owen et al.<br>(2002) |
|                 | KK98-43 | 36.43      | 74.84      | 26.7± 0.7  | Cali<br>br. | 3310 | TCN | Pre<br>LGM | Owen et al.<br>(2002) |
|                 | KK98-44 | 36.43      | 74.84      | 24.7± 0.4  | Cali<br>br. | 3250 | TCN | LGM        | Owen et al.<br>(2002) |
|                 | KK98-45 | 36.43      | 74.84      | 43.5± 0.7  | Cali<br>br. | 3250 | TCN | Pre<br>LGM | Owen et al.<br>(2002) |
|                 | KK98-46 | 36.43      | 74.84      | 33.4± 0.8  | Cali<br>br. | 3250 | TCN | Pre<br>LGM | Owen et al.<br>(2002) |
|                 | KK98-47 | 36.43      | 74.84      | 50.0± 1.1  | Cali<br>br. | 3180 | TCN | Pre<br>LGM | Owen et al.<br>(2002) |
|                 | KK98-50 | 36.43      | 74.84      | 62.6± 1.3  | Cali<br>br. | 3180 | TCN | Pre<br>LGM | Owen et al.<br>(2002) |
|                 | KK98-55 | 36.44      | 74.87      | 55.1± 1.6  | Cali<br>br. | 2760 | TCN | Pre<br>LGM | Owen et al.<br>(2002) |
|                 | KK98-56 | 36.44      | 74.87      | 55.8± 0.9  | Cali<br>br. | 2720 | TCN | Pre<br>LGM | Owen et al.<br>(2002) |
|                 | KK98-57 | 36.44      | 74.87      | 55.4± 1.0  | Cali<br>br. | 2760 | TCN | Pre<br>LGM | Owen et al.<br>(2002) |
|                 | KK98-64 | 36.43      | 74.86      | 29.4± 0.7  | Cali<br>br. | 2660 | TCN | Pre<br>LGM | Owen et al.<br>(2002) |
|                 | KK98-65 | 36.43      | 74.87      | 39.9± 0.7  | Cali<br>br. | 2680 | TCN | Pre<br>LGM | Owen et al.<br>(2002) |
| Skardu<br>Basin | K2-1    | 35.31<br>5 | 75.62<br>6 | 124.9± 4.1 | NS          | 2598 | TCN | Pre<br>LGM | Seong et al<br>(2007) |

|  |       |            |            |            |    |      |     |            |                       |
|--|-------|------------|------------|------------|----|------|-----|------------|-----------------------|
|  | K2-2  | 35.31<br>4 | 75.62<br>5 | 167.6± 2.5 | NS | 2601 | TCN | Pre<br>LGM | Seong et al<br>(2007) |
|  | K2-3  | 35.31<br>4 | 75.62<br>5 | 137.5± 3.4 | NS | 2611 | TCN | Pre<br>LGM | Seong et al<br>(2007) |
|  | K2-4  | 35.31<br>5 | 75.62<br>3 | 170.2± 3.4 | NS | 2598 | TCN | Pre<br>LGM | Seong et al<br>(2007) |
|  | K2-5  | 35.31<br>4 | 75.62<br>6 | 104.3± 1.9 | NS | 2602 | TCN | Pre<br>LGM | Seong et al<br>(2007) |
|  | K2-6  | 35.31<br>4 | 75.62<br>7 | 143.2± 4.0 | NS | 2613 | TCN | Pre<br>LGM | Seong et al<br>(2007) |
|  | K2-7  | 35.31<br>7 | 75.62<br>1 | 93.0± 2.3  | NS | 2545 | TCN | Pre<br>LGM | Seong et al<br>(2007) |
|  | K2-8  | 35.31<br>8 | 75.61<br>8 | 13.5± 2.8  | NS | 2557 | TCN | PG         | Seong et al<br>(2007) |
|  | K2-9  | 35.31<br>8 | 75.61<br>7 | 70.3± 1.7  | NS | 2557 | TCN | Pre<br>LGM | Seong et al<br>(2007) |
|  | K2-12 | 35.67<br>7 | 75.46<br>9 | 16.1± 0.4  | NS | 2950 | TCN | PG         | Seong et al<br>(2007) |
|  | K2-13 | 35.67<br>7 | 75.46<br>9 | 16.7± 0.4  | NS | 2952 | TCN | PG         | Seong et al<br>(2007) |
|  | K2-14 | 35.67<br>7 | 75.47<br>5 | 16.1± 0.5  | NS | 2945 | TCN | PG         | Seong et al<br>(2007) |
|  | K2-15 | 35.67<br>9 | 75.46<br>9 | 16.3± 0.6  | NS | 2950 | TCN | PG         | Seong et al<br>(2007) |
|  | K2-16 | 35.67<br>8 | 75.46<br>9 | 16.0± 0.4  | NS | 2951 | TCN | PG         | Seong et al<br>(2007) |
|  | K2-17 | 35.67<br>6 | 75.46<br>9 | 16.3± 0.4  | NS | 2950 | TCN | PG         | Seong et al<br>(2007) |
|  | K2-18 | 35.67<br>5 | 75.46<br>6 | 16.4± 0.4  | NS | 2868 | TCN | PG         | Seong et al<br>(2007) |
|  | K2-19 | 35.67<br>5 | 75.46<br>6 | 14.6± 0.5  | NS | 2865 | TCN | PG         | Seong et al<br>(2007) |
|  | K2-23 | 35.71<br>8 | 75.52      | 12.9± 0.5  | NS | 2646 | TCN | YD         | Seong et al<br>(2007) |
|  | K2-24 | 35.71<br>8 | 75.52      | 12.4± 0.5  | NS | 2631 | TCN | YD         | Seong et al<br>(2007) |
|  | K2-25 | 35.71<br>8 | 75.52      | 12.1± 0.4  | NS | 2631 | TCN | YD         | Seong et al<br>(2007) |
|  | K2-26 | 35.71<br>9 | 75.52      | 12.6± 0.4  | NS | 2650 | TCN | YD         | Seong et al<br>(2007) |
|  | K2-31 | 35.72<br>1 | 75.67<br>6 | 10.4± 0.3  | NS | 3164 | TCN | H          | Seong et al<br>(2007) |
|  | K2-32 | 35.72<br>2 | 75.67<br>4 | 1.2± 0.2   | NS | 3166 | TCN | H          | Seong et al<br>(2007) |
|  | K2-33 | 35.72<br>4 | 75.67<br>2 | 10.7± 0.4  | NS | 3052 | TCN | H          | Seong et al<br>(2007) |
|  | K2-34 | 35.67<br>2 | 75.79<br>9 | NS         | NS | 3160 | TCN | NS         | Seong et al<br>(2007) |
|  | K2-35 | 35.67<br>2 | 75.79<br>9 | NS         | NS | 3164 | TCN | NS         | Seong et al<br>(2007) |
|  | K2-48 | 35.67<br>1 | 75.79<br>9 | 11.4± 0.4  | NS | 3633 | TCN | YD         | Seong et al<br>(2007) |
|  | K2-49 | 35.67<br>1 | 75.79<br>9 | 11.4± 0.5  | NS | 3631 | TCN | YD         | Seong et al<br>(2007) |

|  |       |            |            |           |    |      |     |    |                       |
|--|-------|------------|------------|-----------|----|------|-----|----|-----------------------|
|  | K2-50 | 35.67<br>1 | 75.79<br>9 | 12.3± 0.4 | NS | 3640 | TCN | YD | Seong et al<br>(2007) |
|  | K2-51 | 35.67<br>1 | 75.79<br>9 | 11.3± 0.3 | NS | 3644 | TCN | YD | Seong et al<br>(2007) |
|  | K2-52 | 35.66<br>7 | 75.79<br>8 | 11.2± 0.3 | NS | 3636 | TCN | YD | Seong et al<br>(2007) |
|  | K2-53 | 35.66<br>7 | 75.79<br>7 | 12.1± 0.3 | NS | 3643 | TCN | YD | Seong et al<br>(2007) |
|  | K2-54 | 35.66<br>6 | 75.79<br>7 | 8.2± 0.2  | NS | 3824 | TCN | H  | Seong et al<br>(2007) |
|  | K2-55 | 35.66<br>6 | 75.79<br>6 | 12.1± 0.3 | NS | 3825 | TCN | YD | Seong et al<br>(2007) |
|  | K2-56 | 35.66<br>8 | 75.79<br>7 | 12.0± 0.4 | NS | 3881 | TCN | YD | Seong et al<br>(2007) |
|  | K2-58 | 35.69<br>4 | 75.71<br>9 | 11.8± 0.4 | NS | 3879 | TCN | YD | Seong et al<br>(2007) |
|  | K2-59 | 35.69<br>4 | 75.71<br>9 | 12.3± 0.3 | NS | 3811 | TCN | YD | Seong et al<br>(2007) |
|  | K2-60 | 35.69<br>4 | 75.71<br>9 | 11.4± 0.3 | NS | 3031 | TCN | YD | Seong et al<br>(2007) |
|  | K2-61 | 35.69<br>4 | 75.71<br>8 | 11.4± 0.3 | NS | 3032 | TCN | YD | Seong et al<br>(2007) |
|  | K2-62 | 35.67<br>2 | 75.81<br>4 | 10.9± 0.4 | NS | 3017 | TCN | H  | Seong et al<br>(2007) |
|  | K2-63 | 35.67<br>2 | 75.81<br>4 | 11.7± 0.4 | NS | 2944 | TCN | YD | Seong et al<br>(2007) |
|  | K2-65 | 35.67<br>2 | 75.81<br>4 | 12.6± 0.4 | NS | 3113 | TCN | YD | Seong et al<br>(2007) |
|  | K2-66 | 35.67<br>2 | 75.81<br>4 | 5.1± 0.2  | NS | 3128 | TCN | H  | Seong et al<br>(2007) |
|  | K2-67 | 35.67<br>2 | 75.81<br>4 | 5.4± 0.2  | NS | 3122 | TCN | H  | Seong et al<br>(2007) |
|  | K2-68 | 35.67<br>2 | 75.81<br>4 | 5.8± 0.2  | NS | 3113 | TCN | H  | Seong et al<br>(2007) |
|  | K2-69 | 35.70<br>3 | 75.95<br>4 | 6.5± 0.2  | NS | 3109 | TCN | H  | Seong et al<br>(2007) |
|  | K2-70 | 35.70<br>3 | 75.95<br>2 | 5.7± 0.2  | NS | 3106 | TCN | H  | Seong et al<br>(2007) |
|  | K2-72 | 35.70<br>3 | 75.95<br>3 | 12.7± 0.3 | NS | 4209 | TCN | YD | Seong et al<br>(2007) |
|  | K2-73 | 35.70<br>4 | 75.95<br>2 | 12.9± 0.3 | NS | 4213 | TCN | YD | Seong et al<br>(2007) |
|  | K2-74 | 35.70<br>3 | 75.95<br>2 | 13.1± 0.3 | NS | 4212 | TCN | PG | Seong et al<br>(2007) |
|  | K2-75 | 35.70<br>3 | 75.94<br>8 | 12.7± 0.4 | NS | 4215 | TCN | PG | Seong et al<br>(2007) |
|  | K2-76 | 35.70<br>3 | 75.94<br>7 | 16.5± 0.4 | NS | 4211 | TCN | PG | Seong et al<br>(2007) |
|  | K2-77 | 35.70<br>3 | 75.94<br>3 | 13.3± 0.3 | NS | 4211 | TCN | PG | Seong et al<br>(2007) |
|  | K2-78 | 35.69<br>5 | 75.95<br>7 | 13.0± 0.3 | NS | 4225 | TCN | PG | Seong et al<br>(2007) |
|  | K2-79 | 35.69<br>4 | 75.95<br>8 | 12.4± 0.3 | NS | 4221 | TCN | PG | Seong et al<br>(2007) |

|                 |        |             |             |           |    |      |     |            |                            |
|-----------------|--------|-------------|-------------|-----------|----|------|-----|------------|----------------------------|
|                 | K2-80  | 35.69<br>4  | 75.95<br>8  | 15.0± 0.4 | NS | 3823 | TCN | PG         | Seong et al<br>(2007)      |
|                 | K2-81  | 35.69<br>3  | 75.96       | 15.3± 0.5 | NS | 3821 | TCN | PG         | Seong et al<br>(2007)      |
|                 | K2-82  | 35.69<br>2  | 75.96       | 14.7± 0.4 | NS | 3818 | TCN | PG         | Seong et al<br>(2007)      |
|                 | K2-83  | 35.69<br>2  | 75.96<br>1  | 45.0± 1.1 | NS | 3779 | TCN | Pre<br>LGM | Seong et al<br>(2007)      |
|                 | K2-84  | 35.68<br>9  | 75.94<br>1  | 11.9± 0.3 | NS | 3768 | TCN | YD         | Seong et al<br>(2007)      |
|                 | K2-85  | 35.68<br>9  | 75.94<br>1  | 12.2± 0.5 | NS | 3766 | TCN | YD         | Seong et al<br>(2007)      |
|                 | K2-86  | 35.68<br>9  | 75.94<br>1  | 11.0± 0.3 | NS | 3445 | TCN | YD         | Seong et al<br>(2007)      |
|                 | K2-87  | 35.68<br>9  | 75.94<br>1  | 11.5± 0.5 | NS | 3442 | TCN | YD         | Seong et al<br>(2007)      |
|                 | K2-88  | 35.68<br>8  | 75.92<br>7  | 12.3± 0.3 | NS | 3447 | TCN | YD         | Seong et al<br>(2007)      |
|                 | K2-89  | 35.68<br>8  | 75.92<br>7  | 10.9± 0.3 | NS | 3441 | TCN | YD         | Seong et al<br>(2007)      |
|                 | K2-90  | 35.68<br>8  | 75.92<br>7  | 0.4± 0.1  | NS | 3095 | TCN | LIA        | Seong et al<br>(2007)      |
|                 | K2-91  | 35.69<br>5  | 75.92<br>7  | 0.9± 0.2  | NS | 3096 | TCN | H          | Seong et al<br>(2007)      |
|                 | K2-92  | 35.68<br>7  | 75.92<br>6  | 0.8± 0.1  | NS | 3094 | TCN | LIA        | Seong et al<br>(2007)      |
|                 | K2-93  | 35.68<br>6  | 75.92<br>6  | 2.1± 0.2  | NS | 3090 | TCN | H          | Seong et al<br>(2007)      |
|                 | K2-94  | 35.68<br>8  | 75.92<br>5  | 0.9± 0.2  | NS | 3096 | TCN | H          | Seong et al<br>(2007)      |
|                 | K2-95  | 35.29<br>2  | 75.66<br>2  | 0.02± 0.2 | NS | 3087 | TCN | M          | Seong et al<br>(2007)      |
|                 | K2-96  | 35.29<br>2  | 75.66<br>2  | 1.2± 0.1  | NS | 3116 | TCN | H          | Seong et al<br>(2007)      |
|                 | K2-116 | 35.29<br>2  | 75.66<br>2  | 5.3± 0.7  | NS | 2276 | TCN | H          | Seong et al<br>(2007)      |
|                 | K2-117 | 35.29<br>2  | 75.66<br>2  | 3.7± 0.2  | NS | 2276 | TCN | H          | Seong et al<br>(2007)      |
|                 | K2-118 | 35.31<br>5  | 75.62<br>6  | 4.6± 0.2  | NS | 2276 | TCN | H          | Seong et al<br>(2007)      |
|                 | K2-119 | 35.31<br>4  | 75.62<br>5  | 3.9± 0.2  | NS | 2276 | TCN | H          | Seong et al<br>(2007)      |
| Hunza<br>Valley | 062    | 36.30<br>27 | 74.51<br>84 | 4.3± 0.4  | NS | 2575 | OSL | H          | Spencer and<br>Owen (2004) |
|                 | 063    | 36.30<br>34 | 74.52       | 8.4± 0.9  | NS | 2565 | OSL | H          | Spencer and<br>Owen (2004) |
|                 | 061    | 36.30<br>17 | 74.53<br>1  | 7.8± 0.7  | NS | 2610 | OSL | H          | Spencer and<br>Owen (2004) |
|                 | 064    | 36.30<br>49 | 74.52<br>88 | 22.8± 3.6 | NS | 2530 | OSL | LGM        | Spencer and<br>Owen (2004) |
|                 | 057    | 36.28<br>16 | 74.53<br>5  | 28.5± 2.7 | NS | 2550 | OSL | Pre<br>LGM | Spencer and<br>Owen (2004) |
|                 | 055    | 36.27<br>48 | 74.54<br>44 | 8.7± 0.8  | NS | 2480 | OSL | H          | Spencer and<br>Owen (2004) |

|                |      |             |             |           |          |      |     |         |                         |
|----------------|------|-------------|-------------|-----------|----------|------|-----|---------|-------------------------|
|                | 060  | 36.29<br>92 | 74.53<br>1  | 12.0± 1.1 | NS       | 2560 | OSL | YD      | Spencer and Owen (2004) |
|                | 059  | 36.29<br>94 | 74.52<br>99 | 18.0± 1.7 | NS       | 2550 | OSL | PG      | Spencer and Owen (2004) |
|                | 056  | 36.27<br>11 | 74.54<br>13 | 18.4± 1.6 | NS       | 2540 | OSL | PG      | Spencer and Owen (2004) |
|                | 067  | 36.26<br>54 | 74.52<br>2  | 31.5± 3.0 | NS       | 2560 | OSL | Pre LGM | Spencer and Owen (2004) |
|                | 070  | 36.24<br>31 | 74.52<br>47 | 44.4± 5.2 | NS       | 2340 | OSL | Pre LGM | Spencer and Owen (2004) |
|                | 066  | 36.26<br>11 | 74.51<br>53 | 31.6± 3.3 | NS       | 2650 | OSL | Pre LGM | Spencer and Owen (2004) |
| Nun-Kun Massif | NK1  | 34.04<br>66 | 75.94<br>73 | 16.3± 1.5 | Cali br. | 3506 | TCN | PG      | Lee et al (2014)        |
|                | NK2  | 34.04<br>66 | 75.94<br>73 | 1.5± 0.1  | Cali br. | 3506 | TCN | H       | Lee et al (2014)        |
|                | NK3  | 34.04<br>66 | 75.94<br>73 | 11.1± 1.0 | Cali br. | 3506 | TCN | H       | Lee et al (2014)        |
|                | NK4  | 34.04<br>66 | 75.94<br>73 | 12.4± 1.1 | Cali br. | 3506 | TCN | YD      | Lee et al (2014)        |
|                | NK5  | 34.04<br>77 | 75.94<br>86 | 24.1± 2.3 | Cali br. | 3542 | TCN | LGM     | Lee et al (2014)        |
|                | NK6  | 34.04<br>77 | 75.94<br>86 | 15.3± 1.5 | Cali br. | 3542 | TCN | PG      | Lee et al (2014)        |
|                | NK7  | 34.04<br>77 | 75.94<br>86 | 13.7± 1.2 | Cali br. | 3542 | TCN | PG      | Lee et al (2014)        |
|                | NK8  | 34.04<br>77 | 75.94<br>86 | 15.9± 1.4 | Cali br. | 3542 | TCN | PG      | Lee et al (2014)        |
|                | NK9  | 34.04<br>66 | 75.95<br>32 | 46.6± 4.2 | Cali br. | 3703 | TCN | Pre LGM | Lee et al (2014)        |
|                | NK10 | 34.04<br>65 | 75.95<br>34 | 38.7± 3.5 | Cali br. | 3713 | TCN | Pre LGM | Lee et al (2014)        |
|                | NK11 | 34.04<br>66 | 75.95<br>37 | 52.8± 4.7 | Cali br. | 3705 | TCN | Pre LGM | Lee et al (2014)        |
|                | NK12 | 34.04<br>66 | 75.95<br>37 | 62.7± 5.6 | Cali br. | 3705 | TCN | Pre LGM | Lee et al (2014)        |
|                | NK13 | 34.04<br>66 | 75.95<br>37 | 57.9± 5.4 | Cali br. | 3701 | TCN | Pre LGM | Lee et al (2014)        |
|                | NK14 | 34.04<br>66 | 75.95<br>3  | 56.7± 5.1 | Cali br. | 3693 | TCN | Pre LGM | Lee et al (2014)        |
|                | NK15 | 34.05<br>22 | 75.94<br>3  | 13.9± 1.5 | Cali br. | 3443 | TCN | PG      | Lee et al (2014)        |
|                | NK16 | 34.05<br>21 | 75.94<br>28 | 8.1± 3.3  | Cali br. | 3454 | TCN | H       | Lee et al (2014)        |
|                | NK17 | 34.05<br>15 | 75.94<br>27 | 16.7± 1.5 | Cali br. | 4253 | TCN | PG      | Lee et al (2014)        |
|                | NK18 | 34.05<br>11 | 75.94<br>28 | 12.0± 1.1 | Cali br. | 3454 | TCN | YD      | Lee et al (2014)        |
|                | NK19 | 34.05<br>05 | 75.94<br>27 | 15.8± 1.5 | Cali br. | 3453 | TCN | PG      | Lee et al (2014)        |
|                | NK20 | 34.05<br>05 | 75.94<br>27 | 13.1± 1.2 | Cali br. | 3453 | TCN | PG      | Lee et al (2014)        |
|                | NK21 | 34.05<br>02 | 75.94<br>28 | 16.5± 1.6 | Cali br. | 3463 | TCN | PG      | Lee et al (2014)        |

|                  |                 |             |             |             |             |      |     |            |                      |
|------------------|-----------------|-------------|-------------|-------------|-------------|------|-----|------------|----------------------|
|                  | NK22            | 34.06<br>23 | 75.92<br>29 | 20.0± 1.8   | Cali<br>br. | 3523 | TCN | LGM        | Lee et al<br>(2014)  |
|                  | NK23            | 34.06<br>26 | 75.92<br>33 | 19.0± 2.3   | Cali<br>br. | 3518 | TCN | LGM        | Lee et al<br>(2014)  |
|                  | NK24            | 34.06<br>23 | 75.92<br>47 | 19.2± 1.8   | Cali<br>br. | 3504 | TCN | LGM        | Lee et al<br>(2014)  |
|                  | NK25            | 34.06<br>37 | 75.92<br>55 | 17.1± 1.6   | Cali<br>br. | 3495 | TCN | PG         | Lee et al<br>(2014)  |
|                  | NK26            | 34.06<br>43 | 75.92<br>63 | 14.8± 1.5   | Cali<br>br. | 3486 | TCN | PG         | Lee et al<br>(2014)  |
|                  | NK27            | 34.06<br>43 | 75.92<br>63 | 16.3± 1.8   | Cali<br>br. | 3486 | TCN | PG         | Lee et al<br>(2014)  |
|                  | NK28            | 34.06<br>44 | 75.92<br>66 | 15.5± 1.5   | Cali<br>br. | 3489 | TCN | PG         | Lee et al<br>(2014)  |
|                  | NK29            | 34.05<br>99 | 75.91<br>81 | 0.4± 0.1    | Cali<br>br. | 3679 | TCN | LIA        | Lee et al<br>(2014)  |
|                  | NK30            | 34.05<br>48 | 75.91<br>73 | 0.5± 0.1    | Cali<br>br. | 3720 | TCN | LIA        | Lee et al<br>(2014)  |
| Hamtah<br>Valley | HAMTA<br>H-1405 | 32.27<br>25 | 77.36<br>74 | 0.21± 0.05  | Cali<br>br. | 4014 | AMS | LIA        | Saha et al<br>(2018) |
|                  | HAMTA<br>H-1406 | 32.27<br>22 | 77.35<br>75 | 0.37± 0.1   | Cali<br>br. | 4023 | AMS | LIA        | Saha et al<br>(2018) |
|                  | HAMTA<br>H-1408 | 32.26<br>86 | 77.35<br>85 | 2.21± 0.18  | Cali<br>br. | 4111 | AMS | H          | Saha et al<br>(2018) |
|                  | HAMTA<br>H-1410 | 32.26<br>78 | 77.35<br>89 | 0.13± 0.03  | Cali<br>br. | 4125 | AMS | M          | Saha et al<br>(2018) |
|                  | HAMTA<br>H-1502 | 32.29<br>54 | 77.36<br>55 | 0.7± 0.07   | Cali<br>br. | 3861 | AMS | LIA        | Saha et al<br>(2018) |
|                  | HAMTA<br>H-1401 | 32.30<br>05 | 77.36<br>84 | 10.48± 0.62 | Cali<br>br. | 3783 | AMS | H          | Saha et al<br>(2018) |
|                  | HAMTA<br>H-1402 | 32.30<br>06 | 77.36<br>85 | 5.93± 0.48  | Cali<br>br. | 3769 | AMS | H          | Saha et al<br>(2018) |
|                  | HAMTA<br>H-1403 | 32.29<br>98 | 77.36<br>7  | 15.67± 0.87 | Cali<br>br. | 3808 | AMS | PG         | Saha et al<br>(2018) |
|                  | HAMTA<br>H-1404 | 32.29<br>92 | 77.36<br>62 | 3.79± 0.23  | Cali<br>br. | 3808 | AMS | H          | Saha et al<br>(2018) |
|                  | HAMTA<br>H-1503 | 32.26<br>85 | 77.35<br>86 | 10.02± 0.47 | Cali<br>br. | 4112 | AMS | H          | Saha et al<br>(2018) |
|                  | HAMTA<br>H-1504 | 32.27<br>03 | 77.35<br>79 | 9.77± 0.47  | Cali<br>br. | 4083 | AMS | H          | Saha et al<br>(2018) |
| Lato Valley      | LATO-<br>1415   | 33.68<br>22 | 77.59<br>2  | 1.72± 0.11  | Cali<br>br. | 5366 | AMS | H          | Saha et al<br>(2018) |
|                  | LATO-<br>1416   | 33.68<br>22 | 77.59<br>21 | 0.2± 0.03   | Cali<br>br. | 5358 | AMS | LIA        | Saha et al<br>(2018) |
|                  | LATO-<br>1417   | 33.68<br>26 | 77.59<br>2  | 0.34± 0.03  | Cali<br>br. | 5348 | AMS | LIA        | Saha et al<br>(2018) |
|                  | LATO-<br>1418   | 33.68<br>26 | 77.59<br>21 | 0.22± 0.03  | Cali<br>br. | 5351 | AMS | LIA        | Saha et al<br>(2018) |
|                  | LATO-<br>1419   | 33.68<br>27 | 77.59<br>2  | 3.31± 0.32  | Cali<br>br. | 5339 | AMS | H          | Saha et al<br>(2018) |
|                  | LATO-<br>1409   | 33.68<br>51 | 77.59<br>53 | 29.25± 1.52 | Cali<br>br. | 5314 | AMS | Pre<br>LGM | Saha et al<br>(2018) |
|                  | LATO-<br>1410   | 33.68<br>51 | 77.59<br>53 | 2.93± 0.21  | Cali<br>br. | 5321 | AMS | H          | Saha et al<br>(2018) |

|               |                 |             |             |            |             |      |     |     |                      |
|---------------|-----------------|-------------|-------------|------------|-------------|------|-----|-----|----------------------|
|               | LATO-1411       | 33.68<br>51 | 77.59<br>52 | 3.92± 0.32 | Cali<br>br. | 5315 | AMS | H   | Saha et al<br>(2018) |
|               | LATO-1412       | 33.68<br>5  | 77.59<br>57 | 0.34± 0.03 | Cali<br>br. | 5315 | AMS | LIA | Saha et al<br>(2018) |
|               | LATO-1413       | 33.68<br>49 | 77.59<br>57 | 0.73± 0.06 | Cali<br>br. | 5317 | AMS | LIA | Saha et al<br>(2018) |
|               | LATO-1414       | 33.68<br>51 | 77.59<br>54 | 0.46± 0.03 | Cali<br>br. | 5314 | AMS | LIA | Saha et al<br>(2018) |
|               | LATO14<br>20    | 33.69<br>14 | 77.60<br>81 | 13.9± 0.74 | Cali<br>br. | 5191 | AMS | PG  | Saha et al<br>(2018) |
|               | LATO14<br>21    | 33.69<br>13 | 77.60<br>83 | 13.77± 0.7 | Cali<br>br. | 5180 | AMS | PG  | Saha et al<br>(2018) |
|               | LATO16<br>01    | 33.69<br>11 | 77.60<br>86 | 14.65± 0.7 | Cali<br>br. | 5171 | AMS | PG  | Saha et al<br>(2018) |
|               | LATO14<br>05    | 33.68<br>05 | 77.62<br>11 | 2.08± 1.42 | Cali<br>br. | 5134 | AMS | H   | Saha et al<br>(2018) |
|               | LATO14<br>08    | 33.69<br>07 | 77.62<br>11 | 1.57± 0.27 | Cali<br>br. | 5136 | AMS | H   | Saha et al<br>(2018) |
| Stok Valley   | STOK-1405       | 33.98<br>72 | 77.46<br>01 | 0.92± 0.07 | Cali<br>br. | 5370 | AMS | H   | Saha et al<br>(2018) |
|               | STOK-1406       | 33.98<br>7  | 77.46       | 0.55± 0.04 | Cali<br>br. | 5314 | AMS | LIA | Saha et al<br>(2018) |
|               | STOK-1407       | 33.98<br>71 | 77.46<br>08 | 0.14± 0.03 | Cali<br>br. | 5340 | AMS | M   | Saha et al<br>(2018) |
|               | STOK-1408       | 33.98<br>71 | 77.46<br>06 | 1.17± 0.11 | Cali<br>br. | 5308 | AMS | H   | Saha et al<br>(2018) |
|               | STOK-1516       | 33.98<br>72 | 77.45<br>99 | 0.92± 0.1  | Cali<br>br. | 5303 | AMS | H   | Saha et al<br>(2018) |
|               | STOK-1401       | 33.98<br>73 | 77.45<br>57 | 2.00± 0.14 | Cali<br>br. | 5329 | AMS | H   | Saha et al<br>(2018) |
|               | STOK-1402       | 33.98<br>79 | 77.45<br>57 | 1.48± 0.12 | Cali<br>br. | 5330 | AMS | H   | Saha et al<br>(2018) |
|               | STOK-1403       | 33.98<br>83 | 77.45<br>7  | 1.84± 0.14 | Cali<br>br. | 5323 | AMS | H   | Saha et al<br>(2018) |
|               | STOK-1404       | 33.98<br>82 | 77.45<br>71 | 0.25± 0.02 | Cali<br>br. | 5328 | AMS | LIA | Saha et al<br>(2018) |
| Karzok Valley | KO-7            | 32.93<br>28 | 78.21<br>36 | 0.23± 0.02 | Cali<br>br. | 5524 | AMS | LIA | Saha et al<br>(2018) |
|               | KO-8            | 32.93<br>33 | 78.21<br>36 | 0.68± 0.08 | Cali<br>br. | 5516 | AMS | LIA | Saha et al<br>(2018) |
|               | KO-9            | 32.93<br>41 | 78.21<br>47 | 0.68± 0.05 | Cali<br>br. | 5503 | AMS | LIA | Saha et al<br>(2018) |
|               | KO-10           | 32.93<br>45 | 78.21<br>48 | 0.53± 0.09 | Cali<br>br. | 5503 | AMS | LIA | Saha et al<br>(2018) |
|               | KO1             | 32.93<br>21 | 78.21<br>43 | 2.46± 0.19 | Cali<br>br. | 5532 | AMS | H   | Saha et al<br>(2018) |
|               | KO-2            | 32.93<br>17 | 78.21<br>43 | 1.07± 0.09 | Cali<br>br. | 5541 | AMS | H   | Saha et al<br>(2018) |
|               | KO-3            | 32.93<br>14 | 78.21<br>42 | 0.95± 0.07 | Cali<br>br. | 5548 | AMS | H   | Saha et al<br>(2018) |
|               | MENTO<br>K-1505 | 32.93<br>12 | 78.21<br>45 | 1.00± 0.07 | Cali<br>br. | 5569 | AMS | H   | Saha et al<br>(2018) |
|               | MENTO<br>K-1506 | 32.93<br>11 | 78.21<br>45 | 0.88± 0.08 | Cali<br>br. | 5574 | AMS | LIA | Saha et al<br>(2018) |



|                     |              |             |             |                            |             |      |     |            |                              |
|---------------------|--------------|-------------|-------------|----------------------------|-------------|------|-----|------------|------------------------------|
|                     | MENTO K-1501 | 32.94<br>13 | 78.22<br>42 | 60.02± 3.51                | Cali<br>br. | 5331 | AMS | Pre<br>LGM | Saha et al<br>(2018)         |
|                     | MENTO K-1502 | 32.94<br>11 | 78.22<br>42 | 38.32± 1.99                | Cali<br>br. | 5335 | AMS | Pre<br>LGM | Saha et al<br>(2018)         |
|                     | MENTO K-1503 | 32.94<br>08 | 78.22<br>42 | 23.76± 1.08                | Cali<br>br. | 5339 | AMS | LGM        | Saha et al<br>(2018)         |
|                     | KO-14        | 32.96<br>72 | 78.17<br>94 | 2.27± 0.19                 | Cali<br>br. | 5374 | AMS | HI         | Saha et al<br>(2018)         |
|                     | KO-15        | 32.96<br>78 | 78.17<br>96 | 0.62± 0.05                 | Cali<br>br. | 5366 | AMS | LIA        | Saha et al<br>(2018)         |
|                     | KO-16        | 32.96<br>78 | 78.17<br>96 | 0.48± 0.06                 | Cali<br>br. | 5366 | AMS | LIA        | Saha et al<br>(2018)         |
|                     | KO1601       | 32.96<br>8  | 78.17<br>96 | 1.73± 0.12                 | Cali<br>br. | 5374 | AMS | H          | Saha et al<br>(2018)         |
|                     | KO1602       | 32.96<br>71 | 78.18       | 2.51± 0.19                 | Cali<br>br. | 5388 | AMS | H          | Saha et al<br>(2018)         |
|                     | KO-17        | 32.97<br>06 | 78.17<br>87 | 3.16± 0.23                 | Cali<br>br. | 5331 | AMS | H          | Saha et al<br>(2018)         |
|                     | KO-18        | 32.97<br>08 | 78.17<br>8  | 4.74± 0.28                 | Cali<br>br. | 5337 | AMS | H          | Saha et al<br>(2018)         |
|                     | KO-1501      | 32.97<br>2  | 78.18<br>15 | 5.92± 0.3                  | Cali<br>br. | 5327 | AMS | H          | Saha et al<br>(2018)         |
|                     | KO-1502      | 32.97<br>24 | 78.18<br>12 | 12.42± 0.7                 | Cali<br>br. | 5334 | AMS | YD         | Saha et al<br>(2018)         |
| Zanskar Valley      | VO53         | 33.5        | 76.53       | 78.0± 12.3                 | NS          | 3500 | OSL | Pre<br>LGM | Taylor et<br>Mitchell (2000) |
| Tsarp-Lingti Valley | VO55         | 33.14<br>76 | 77.53<br>64 | 40.0± 9.3                  | NS          | 4040 | OSL | Pre<br>LGM | Taylor et<br>Mitchell (2000) |
| Zanskar Valley      | VO56         | 33.32       | 76.59       | 88.6± 33.6  <br>98.8± 41.0 | NS          | 3600 | OSL | Pre<br>LGM | Taylor et<br>Mitchell (2000) |
| Stod/Zanskar Valley | VO58         | 33.28       | 76.55       | 19.9± 5.2                  | NS          | 3600 | OSL | LGM        | Taylor et<br>Mitchell (2000) |
| Yunan Valley        | VO59         | 32.50<br>4  | 77.26<br>96 | 16.2± 5.6                  | NS          | 4850 | OSL | PG         | Taylor et<br>Mitchell (2000) |
| Yunan Valley        | VO60         | 32.54<br>45 | 77.34<br>78 | 13.1± 4.9                  | NS          | 4210 | OSL | PG         | Taylor et<br>Mitchell (2000) |
| Yunan Valley        | VO62         | 32.50<br>93 | 77.29<br>61 | 10.2± 2.1                  | NS          | 4550 | OSL | H          | Taylor et<br>Mitchell (2000) |
| Pang                | VO64         | 33.08<br>17 | 77.49<br>31 | 37.5± 21.2                 | NS          | 3308 | OSL | Pre<br>LGM | Taylor et<br>Mitchell (2000) |
| Nimaling Valley     | VO65         | 33.49<br>71 | 77.30<br>5  | 12.8± 4.7                  | NS          | 4200 | OSL | YD         | Taylor et<br>Mitchell (2000) |
| Yunan Valley        | VO67         | 32.48<br>75 | 77.27<br>41 |                            | NS          | 4710 | OSL |            | Taylor et<br>Mitchell (2000) |
| Thajwas Valley      | TLM-1        | 34.29<br>04 | 75.26<br>51 | 19.11± 2.004               | NS          | 2858 | TCN | LGM        | Jaan Paul et al<br>(2022)    |
|                     | TLM-2        | 34.29<br>26 | 75.26<br>34 | 22.437±2.55                | NS          | 2807 | TCN | LGM        | Jaan Paul et al<br>(2022)    |
|                     | LM-1         | 34.29<br>1  | 75.26<br>45 | 11.149±1.24<br>8           | NS          | 2820 | TCN | YD         | Jaan Paul et al<br>(2022)    |
|                     | LM-2         | 34.29<br>03 | 75.26<br>57 | 12.145±1.54<br>1           | NS          | 2829 | TCN | YD         | Jaan Paul et al<br>(2022)    |
|                     | LM-3         | 34.29<br>03 | 75.26<br>53 | 11.091±2.29                | NS          | 2816 | TCN | YD         | Jaan Paul et al<br>(2022)    |

|  |       |             |             |             |    |      |     |   |                           |
|--|-------|-------------|-------------|-------------|----|------|-----|---|---------------------------|
|  | TM-1  | 34.30<br>31 | 75.27<br>25 | 9.151±1.481 | NS | 2729 | TCN | H | Jaan Paul et al<br>(2022) |
|  | TM-2  | 34.30<br>18 | 75.27<br>37 | 9.468±1.398 | NS | 2730 | TCN | H | Jaan Paul et al<br>(2022) |
|  | TM-3  | 34.30<br>17 | 75.27<br>36 | 8.743±1.292 | NS | 2725 | TCN | H | Jaan Paul et al<br>(2022) |
|  | RTM-1 | 34.29<br>32 | 75.26<br>62 | 4.838±0.866 | NS | 2738 | TCN | H | Jaan Paul et al<br>(2022) |
|  | RTM-2 | 34.29<br>27 | 75.26<br>74 | 3.539±0.692 | NS | 2721 | TCN | H | Jaan Paul et al<br>(2022) |

A = Calibration B = Interpretation LGM = Last Glacial Maximum PG = Post-Glacial H = Holocene M = Modern
